# Supplementary material for: Serum Metabolome Adaptations Following 12 Weeks of High-Intensity Interval Training or Moderate-Intensity Continuous Training in Obese Older Adults
Source: MDPI journal article supplement (doi:10.3390/metabo13020198), 2023-01-29
Supplement: s1 [file s1]

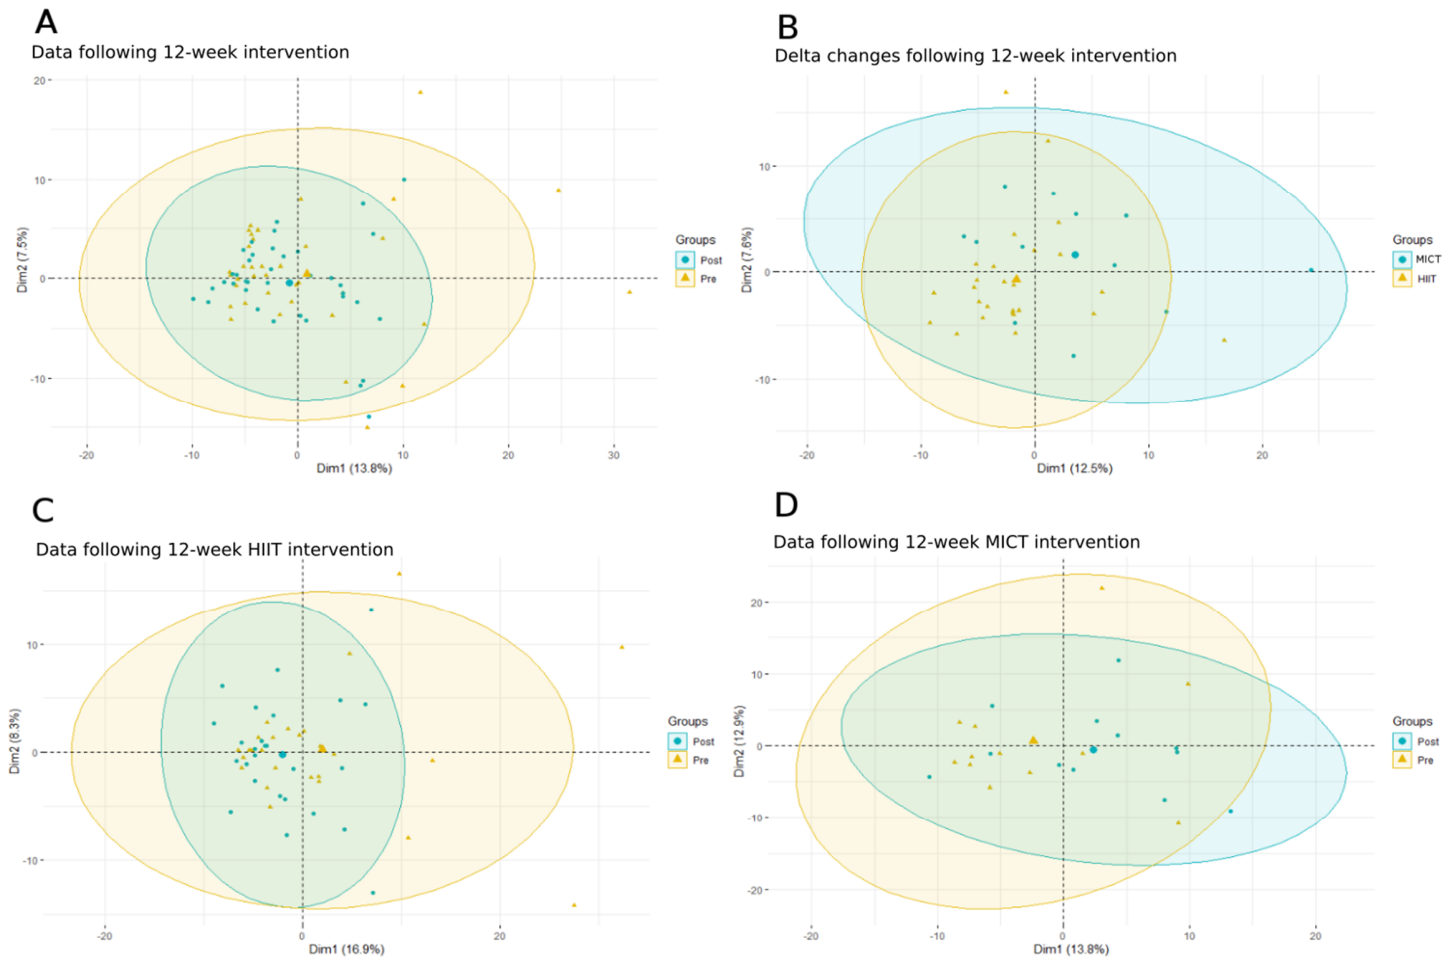

**Figure S1:** Principal Component Analysis (PCA) of the metabolome following a 12-week HIIT or MICT in obese older adults. PCA plots performed following the overall 12-week HIIT and MICT interventions together (A); on the delta changes following the 12-week HIIT and MICT interventions (B) following the 12-week HIIT intervention alone (C), following the 12-week MICT intervention alone (D). Individuals refers to participants; Pre = before the 12-week intervention; Post = after the 12-week

**Table S1:** Effect of a 12-week High-Intensity Interval Training (HIIT) and Moderate-Intensity Continuous Training (MICT) on functional capacities and skeletal muscle function parameters in obese older adults.

| Parameters                      | HIIT (n = 26)   |                    | MICT (n = 12)   |                 | <i>p</i> -value |                   |
|---------------------------------|-----------------|--------------------|-----------------|-----------------|-----------------|-------------------|
|                                 | Pre             | Post               | Pre             | Post            | Time effect     | Time×Group effect |
| <b>Functional capacities</b>    |                 |                    |                 |                 |                 |                   |
| 6 min walking test (m)          | 548.61 ± 80.75  | 617.81 ± 93.05 ### | 534.08 ± 90.15  | 553.17 ± 75.81  | < <b>0.0001</b> | <b>0.02</b>       |
| Step test (n)                   | 28.76 ± 4.35    | 33.04 ± 5.33 ###   | 24.08 ± 7.14    | 25.25 ± 5.54    | < <b>0.0001</b> | <b>0.005</b>      |
| 4 m walk test normal (m/s)      | 1.37 ± 0.16     | 1.47 ± 0.15 ###    | 1.24 ± 0.18     | 1.34 ± 0.22 ##  | < <b>0.0001</b> | 0.98              |
| 4 m walk test fast (m/s)        | 1.93 ± 0.22     | 2.07 ± 0.25        | 1.80 ± 0.33     | 2.01 ± 0.73     | <b>0.02</b>     | 0.60              |
| Unipodal Balance Test (s/60s)   | 24.73 ± 16.31   | 37.17 ± 20.42 ###  | 32.55 ± 21.94   | 40.01 ± 25.93   | <b>0.0002</b>   | 0.39              |
| Chair test (s)                  | 20.19 ± 5.33    | 16.19 ± 4.15 ###   | 23.91 ± 6.19    | 22.37 ± 4.71    | <b>0.0001</b>   | 0.13              |
| Timed Up and Go test (s)        | 10.20 ± 1.35    | 9.13 ± 1.12 ##     | 10.91 ± 2.21    | 9.73 ± 2.89 #   | <b>0.0004</b>   | 0.86              |
| <b>Skeletal muscle function</b> |                 |                    |                 |                 |                 |                   |
| Handgrip strength (kg)          | 34.01 ± 12.58   | 33.98 ± 11.07      | 33.28 ± 13.75   | 25.54 ± 16.95 # | 0.23            | 0.09              |
| Handgrip strength/BW            | 0.41 ± 0.12     | 0.41 ± 0.10        | 0.42 ± 0.14     | 0.39 ± 0.14     | 0.73            | 0.49              |
| Handgrip strength/ALM           | 6.72 ± 3.36     | 6.17 ± 0.84        | 6.27 ± 1.18     | 6.14 ± 1.58     | 0.55            | 0.55              |
| Quadriceps strength (N)         | 407.11 ± 191.90 | 386.55 ± 157.29    | 482.03 ± 185.60 | 499.16 ± 197.30 | 0.65            | 0.07              |
| Quadriceps/BW                   | 4.96 ± 1.97     | 4.77 ± 1.47        | 5.99 ± 1.78     | 6.18 ± 1.90     | 0.45            | 0.09              |
| Quadriceps/LLM                  | 15.82 ± 11.16   | 13.95 ± 7.93 #     | 27.84 ± 7.08    | 29.27 ± 7.61    | 0.44            | <b>0.02</b>       |
| Lower limb power (W)            | 162.08 ± 77.76  | 185.35 ± 77.70     | 120.00 ± 66.13  | 176.42 ± 77.81  | <b>0.0001</b>   | 0.05              |

Data are presented as: mean ± SD. HIIT = high-intensity interval training; MICT = moderate-intensity continuous training; Pre = before the 12-week intervention; Post = after the 12-week intervention; BW = body weight; ALM = arms lean mass; LLM = legs lean mass; Quad = quadriceps. Time effect and Time×Group effects were analyzed using two-way repeated measures ANOVA. #  $p < 0.05$ , ##  $p < 0.01$ , ###  $p < 0.001$  = Significant intra-group differences between pre and post intervention using two-ways repeated measures ANOVA followed by post-hoc analyses done with simultaneous tests for general linear hypotheses.

**Table S2:** Effect of a 12-week High-Intensity Interval Training (HIIT) and Moderate-Intensity Continuous Training (MICT) on body composition parameters in obese older adults.

| Parameters                                | HIIT (n = 26)  |                           | MICT (n = 12)  |                            | <i>p</i> -value |                   |
|-------------------------------------------|----------------|---------------------------|----------------|----------------------------|-----------------|-------------------|
|                                           | Pre            | Post                      | Pre            | Post                       | Time effect     | Time×Group effect |
| <b>Anthropometry</b>                      |                |                           |                |                            |                 |                   |
| Body Weight (kg)                          | 82.11 ± 14.39  | 81.98 ± 14.22             | 79.86 ± 16.99  | 80.52 ± 16.93              | 0.82            | 0.49              |
| BMI (kg/m <sup>2</sup> )                  | 30.28 ± 5.38   | 30.24 ± 5.36              | 29.09 ± 5.85   | 29.34 ± 5.73               | 0.81            | 0.47              |
| <b>Fat and lean mass (DXA)</b>            |                |                           |                |                            |                 |                   |
| Total lean mass (kg)                      | 47.65 ± 9.33   | 48.36 ± 9.72              | 50.25 ± 12.92  | 47.89 ± 12.98              | 0.06            | 0.41              |
| Arms lean mass (kg)                       | 5.54 ± 1.75    | 5.60 ± 1.67               | 5.27 ± 1.76    | 5.24 ± 1.80                | 0.64            | 0.95              |
| Legs lean mass (kg)                       | 16.88 ± 3.47   | 17.21 ± 3.64 <sup>#</sup> | 17.02 ± 4.69   | 16.86 ± 4.38               | 0.11            | <b>0.04</b>       |
| Total fat mass (%)                        | 37.75 ± 7.93   | 37.27 ± 7.67              | 37.34 ± 7.22   | 37.02 ± 7.04               | 0.10            | 0.76              |
| Arms fat mass (%)                         | 35.94 ± 10.76  | 35.14 ± 10.33             | 32.47 ± 10.38  | 34.12 ± 10.67 <sup>#</sup> | 0.97            | <b>0.01</b>       |
| Legs fat mass (%)                         | 35.79 ± 11.11  | 35.11 ± 11.01             | 34.81 ± 11.08  | 33.92 ± 10.61              | <b>0.02</b>     | 0.77              |
| Android fat mass (%)                      | 47.07 ± 7.45   | 46.65 ± 7.55              | 47.47 ± 5.90   | 47.54 ± 5.66               | 0.47            | 0.54              |
| Gynoid fat mass (%)                       | 39.88 ± 10.48  | 39.59 ± 10.30             | 38.75 ± 11.05  | 38.80 ± 10.77              | 0.54            | 0.59              |
| <b>Muscle composition (pQCT)</b>          |                |                           |                |                            |                 |                   |
| Total muscle area (cm <sup>2</sup> )      | 103.66 ± 29.40 | 102.53 ± 32.17            | 104.22 ± 29.82 | 100.64 ± 22.77             | 0.25            | 0.41              |
| Total fat area (cm <sup>2</sup> )         | 91.65 ± 52.16  | 86.72 ± 48.20             | 76.69 ± 47.61  | 74.80 ± 47.46              | 0.23            | 0.66              |
| Subcutaneous fat area (cm <sup>2</sup> )  | 86.59 ± 51.85  | 81.90 ± 47.46             | 72.16 ± 47.38  | 70.02 ± 47.24              | 0.25            | 0.73              |
| Intramuscular fat area (cm <sup>2</sup> ) | 5.05 ± 2.31    | 4.83 ± 2.35               | 4.65 ± 2.54    | 4.36 ± 1.89                | 0.65            | 0.95              |

Data are presented as: mean ± SD. HIIT = high-intensity interval training; MICT = moderate-intensity continuous training; Pre = before the 12-week intervention; Post = after the 12-week intervention; DXA = dual-energy X-ray absorptiometry; pQCT = peripheral quantitative computed tomography; BMI = body mass index. Time effect and Time×Group effect were analyzed using two-way repeated measures ANOVA. <sup>#</sup> *p* < 0.05 = Significant intra-group differences between pre and post intervention using two-ways repeated measures ANOVA followed by post-hoc analyses done with simultaneous tests for general linear hypotheses.

**Table S3:** Effect of a 12-week High-Intensity Interval Training (HIIT) and Moderate-Intensity Continuous Training (MICT) on biological parameters in obese older adults.

| Parameters                                | HIIT (n = 26)  |                             | MICT (n = 12) |               | <i>p</i> -value |                   |
|-------------------------------------------|----------------|-----------------------------|---------------|---------------|-----------------|-------------------|
|                                           | Pre            | Post                        | Pre           | Post          | Time effect     | Time×Group effect |
| <b>Biological parameters</b>              |                |                             |               |               |                 |                   |
| Adiponectin (μg.ml <sup>-1</sup> )        | 14.51 ± 7.98   | 14.24 ± 8.04                | 12.03 ± 3.66  | 12.33 ± 4.80  | 0.87            | 0.61              |
| Leptin (ng.ml <sup>-1</sup> )             | 22.72 ± 18.82  | 26.23 ± 21.41               | 24.27 ± 21.90 | 23.35 ± 18.54 | 0.31            | 0.31              |
| Adiponectin/leptin                        | 0.85 ± 0.85    | 1.21 ± 1.60                 | 1.21 ± 1.60   | 1.00 ± 1.04   | 0.29            | 0.59              |
| Free fatty acids (mmol.l <sup>-1</sup> )  | 0.52 ± 0.15    | 0.45 ± 0.18                 | 0.53 ± 0.19   | 0.54 ± 0.21   | 0.19            | 0.27              |
| Total cholesterol (mmol.l <sup>-1</sup> ) | 4.97 ± 1.12    | 5.00 ± 1.07                 | 4.77 ± 0.78   | 4.93 ± 0.74   | 0.56            | 0.63              |
| HDL (mmol.l <sup>-1</sup> )               | 1.43 ± 0.37    | 1.46 ± 0.32                 | 1.32 ± 0.30   | 1.35 ± 0.35   | 0.08            | 0.90              |
| LDL (mmol.l <sup>-1</sup> )               | 2.85 ± 0.92    | 2.92 ± 0.89                 | 2.73 ± 0.71   | 2.87 ± 0.61   | 0.37            | 0.79              |
| Triglycerides (mmol)                      | 1.53 ± 0.71    | 1.35 ± 0.68                 | 1.59 ± 0.55   | 1.54 ± 0.69   | 0.09            | 0.48              |
| Ferritin (μg.l <sup>-1</sup> )            | 138.33 ± 91.43 | 122.81 ± 94.46 <sup>#</sup> | 93.65 ± 48.65 | 82.67 ± 43.54 | <b>0.01</b>     | 0.68              |
| IGF1 (μg.ml <sup>-1</sup> )               | 0.08 ± 0.02    | 0.09 ± 0.02                 | 0.09 ± 0.02   | 0.09 ± 0.03   | 0.16            | 0.77              |
| IGFBP3 (μg.ml <sup>-1</sup> )             | 1.78 ± 0.39    | 1.87 ± 0.34                 | 1.73 ± 0.25   | 1.70 ± 0.27   | 0.22            | 0.16              |
| IGF1/IGFBP3                               | 0.05 ± 0.01    | 0.05 ± 0.01                 | 0.05 ± 0.01   | 0.05 ± 0.01   | 0.45            | 0.23              |
| Glucose (mmol.l <sup>-1</sup> )           | 5.99 ± 1.28    | 6.04 ± 1.46                 | 5.70 ± 0.47   | 5.70 ± 0.80   | 0.72            | 0.81              |
| Insulin (pmol)                            | 49.06 ± 23.57  | 49.03 ± 29.36               | 55.10 ± 35.51 | 46.41 ± 26.04 | 0.29            | 0.13              |
| QUICKI                                    | 0.42 ± 0.05    | 0.43 ± 0.05                 | 0.42 ± 0.04   | 0.43 ± 0.04   | 0.14            | 0.64              |
| HOMA-IR (M.U)                             | 2.19 ± 1.19    | 2.21 ± 1.43                 | 2.35 ± 1.57   | 1.94 ± 1.05   | 0.37            | 0.16              |

Data are presented as: mean ± SD. HIIT = High-Intensity Interval Training; MICT = moderate-intensity continuous training; Pre = before the 12-week intervention; Post = after the 12-week intervention; HDL = high-density lipoprotein; LDL = low-density lipoprotein; IGF-1 = insulin-like growth factor-1; IGFBP-3 = insulin-like growth factor binding protein-3; QUICKI = quantitative insulin-sensitivity check index; HOMA = homeostatic model assessment for insulin resistance; M.U = mass unit. Time effect and Time×Group effect were analyzed using two-way repeated measures ANOVA. <sup>#</sup> *p* < 0.05 = Significant intra-group differences between pre and post intervention using two-ways repeated measures ANOVA followed by post-hoc analyses done with simultaneous tests for general linear hypotheses.

**Table S4–a:** False Discovery Rate Analysis (FDR) on the 50 significant metabolites obtained following a 12–week High–Intensity Interval Training (HIIT) or Moderate–Intensity Continuous Training (MICT) in obese older adults.

| Metabolites                       | ANOVA                |                      | FDR (BH)    |                      |
|-----------------------------------|----------------------|----------------------|-------------|----------------------|
|                                   | Time effect          | Time×Training effect | Time effect | Time×Training effect |
| <i>TCA cycle</i>                  |                      |                      |             |                      |
| 2–oxoglutaric acid                | <b>0.0002**</b>      | 0.13                 | <b>0.03</b> | 0.57                 |
| 3–methylhistidine                 | <b>0.006**</b>       | 0.79                 | 0.35        | 0.96                 |
| Aspartic acid                     | 0.12                 | <b>0.005**</b>       | 0.63        | 0.17                 |
| Fumaric acid                      | <b>0.001**</b>       | 0.71                 | 0.09        | 0.94                 |
| Pyruvic acid and Oxaloacetic acid | <b>0.03*</b>         | 0.56                 | 0.56        | 0.89                 |
| Aspartate/Malate                  | 0.13                 | <b>0.003**</b>       | 0.65        | 0.15                 |
| <i>Carbohydrate metabolism</i>    |                      |                      |             |                      |
| Acetic acid                       | <b>0.04*</b>         | 0.32                 | 0.56        | 0.17                 |
| Glyceric acid                     | <b>&lt;0.0001***</b> | 0.08                 | <b>0.03</b> | 0.17                 |
| Ribitol                           | 0.75                 | <b>0.04*</b>         | 0.51        | 0.51                 |
| Xylitol                           | <b>0.02*</b>         | <b>0.004**</b>       | 0.15        | 0.15                 |
| Xylose                            | 0.31                 | <b>0.008**</b>       | 0.73        | 0.25                 |
| <i>Amino acid metabolism</i>      |                      |                      |             |                      |
| 2–aminoadipic acid                | <b>0.03*</b>         | 0.08                 | 0.52        | 0.52                 |
| 2–hydroxybutyric acid             | 0.12                 | <b>0.04*</b>         | 0.63        | 0.58                 |
| 2–oxovaleric acid                 | <b>0.01*</b>         | 0.57                 | 0.35        | 0.89                 |
| 3–hydroxybutyric acid             | <b>0.03*</b>         | 0.44                 | 0.52        | 0.81                 |
| Ketoisovaleric acid               | <b>0.002**</b>       | 0.05                 | 0.14        | 0.52                 |
| Hypotaurine                       | 0.07                 | <b>0.04*</b>         | 0.57        | 0.52                 |
| Inosine                           | <b>0.01*</b>         | <b>0.01*</b>         | 0.35        | 0.23                 |
| Ornithine                         | <b>0.01*</b>         | 0.21                 | 0.35        | 0.65                 |
| Proline                           | 0.68                 | <b>0.04*</b>         | 0.92        | 0.52                 |
| Uric acid                         | 0.36                 | <b>0.002**</b>       | 0.74        | 0.15                 |
| Xanthine                          | 0.27                 | <b>0.01*</b>         | 0.71        | 0.23                 |

FDR = False Discovery Rate, BH = Benjamini–Hochberg, TCA = Tricarboxylic acid, / = ratio, \*: < 0.05, \*\*: < 0.01, \*\*\*: < 0.001

**Table S4–b:** False Discovery Rate Analysis (FDR) on the 50 significant metabolites obtained following a 12–week High–Intensity Interval Training (HIIT) or Moderate–Intensity Continuous Training (MICT) in obese older adults.

| Metabolites                  | ANOVA          |                      | FDR (BH)    |                      |
|------------------------------|----------------|----------------------|-------------|----------------------|
|                              | Time effect    | Time×Training effect | Time effect | Time×Training effect |
| <i><b>Fat metabolism</b></i> |                |                      |             |                      |
| Acetylcarnitine              | <b>0.02*</b>   | 0.71                 | 0.49        | 0.94                 |
| Arachidonic acid             | <b>0.02*</b>   | 0.78                 | 0.52        | 0.96                 |
| Butanoic acid                | <b>0.03*</b>   | 0.84                 | 0.52        | 0.97                 |
| Carnitine C18:0              | <b>0.04*</b>   | 0.55                 | 0.56        | 0.88                 |
| Ceramide (18:1/22:0)         | 0.94           | <b>0.02*</b>         | 0.98        | 0.71                 |
| Ceramide (18:1/24:0)         | 0.39           | <b>0.03*</b>         | 0.74        | 0.49                 |
| DG (18:1/18:3)               | 0.86           | <b>0.0004***</b>     | 0.96        | 0.14                 |
| DG (20:4/18:2)               | <b>0.04*</b>   | 0.67                 | 0.56        | 0.94                 |
| Isobutyric acid              | <b>0.007**</b> | 0.15                 | 0.35        | 0.57                 |
| Linoleic acid                | <b>0.03*</b>   | 0.66                 | 0.69        | 0.52                 |
| Margaric acid                | <b>0.001**</b> | 0.28                 | 0.09        | 0.72                 |
| Pantothenic acid             | 0.09           | <b>0.003**</b>       | 0.57        | 0.15                 |
| PCae (15:0)                  | 0.18           | <b>0.01*</b>         | 0.68        | 0.25                 |
| PCae (16:0)                  | 0.19           | <b>0.02*</b>         | 0.69        | 0.41                 |
| PCae (20:2)                  | 0.75           | <b>0.03*</b>         | 0.93        | 0.49                 |
| PCae (22:1)                  | 0.29           | <b>0.03*</b>         | 0.72        | 0.80                 |
| PCae (22:4)                  | 0.92           | <b>0.04*</b>         | 0.52        | 0.52                 |
| PEaa (36:1)                  | 0.67           | <b>0.04*</b>         | 0.92        | 0.51                 |
| PEaa (38:6)                  | 0.74           | <b>0.02*</b>         | 0.93        | 0.41                 |
| PEee (19:1)                  | <b>0.02*</b>   | <b>0.03*</b>         | 0.49        | 0.49                 |
| TG (12:0/12:0/16:1)          | <b>0.04*</b>   | 0.48                 | 0.56        | 0.82                 |
| TG (12:0/14:0/16:0)          | <b>0.02*</b>   | 0.24                 | 0.49        | 0.70                 |
| TG (14:0/16:0/16:0)          | <b>0.04*</b>   | 0.74                 | 0.56        | 0.94                 |
| TG (14:0/16:2/16:2)          | <b>0.03</b>    | 0.81                 | 0.52        | 0.97                 |
| TG (16:1/18:1/18:0)          | 0.35           | <b>0.003**</b>       | 0.15        | 0.57                 |
| TG (16:1/18:3/18:2)          | 0.09           | <b>0.004**</b>       | 0.74        | 0.15                 |
| TG (16:1/18:3/20:4)          | 0.96           | <b>0.02*</b>         | 0.98        | 0.41                 |
| TG (16:2/18:2/18:2)          | <b>0.04*</b>   | <b>0.002**</b>       | 0.56        | 0.15                 |
| Undecanoic acid              | <b>0.06*</b>   | <b>0.001**</b>       | 0.57        | 0.15                 |

FDR = False Discovery Rate, BH = Benjamini–Hochberg, DG = Diglyceride; PCae = acyl–alkyl–phosphatidylcholine; PEaa = alkyl acyl–phosphatidylethanolamine; PEee = ether–phosphatidylethanolamine; TG = Triglyceride \*: < 0.05, \*\*: < 0.01, \*\*\*: < 0.001

**Table S5–a:** False Discovery Rate Analysis (FDR) for each type of intervention alone on the 50 significant metabolites obtained following a 12–week High–Intensity Interval Training (HIIT) or Moderate–Intensity Continuous Training (MICT) in obese older adults.

| Metabolites                       | ANOVA                 |                  | FDR (BH)       |              |
|-----------------------------------|-----------------------|------------------|----------------|--------------|
|                                   | HIIT effect           | MICT effect      | HIIT effect    | MICT effect  |
| <i>TCA cycle</i>                  |                       |                  |                |              |
| 2–oxoglutaric acid                | <b>0.01*</b>          | <b>0.0007***</b> | 0.29           | <b>0.04*</b> |
| 3–methylhistidine                 | <b>0.03*</b>          | 0.06             | 0.94           | 0.14         |
| Aspartic acid                     | <b>0.004**</b>        | 0.12             | 0.19           | 0.65         |
| Fumaric acid                      | <b>0.003**</b>        | 0.09             | 0.17           | 0.59         |
| Pyruvic acid and Oxaloacetic acid | 0.14                  | 0.09             | 0.58           | 0.59         |
| Aspartate/Malate                  | <b>0.003**</b>        | 0.08             | 0.17           | 0.58         |
| <i>Carbohydrate metabolism</i>    |                       |                  |                |              |
| Acetic acid                       | <b>0.02*</b>          | 0.72             | 0.42           | 0.72         |
| Glyceric acid                     | <b>&lt; 0.0001***</b> | 0.19             | <b>0.003**</b> | 0.69         |
| Ribitol                           | 0.15                  | 0.13             | 0.58           | 0.65         |
| Xylitol                           | 0.79                  | <b>0.0003***</b> | 0.93           | <b>0.04*</b> |
| Xylose                            | 0.47                  | <b>0.005**</b>   | 0.72           | 0.14         |
| <i>Amino acid metabolism</i>      |                       |                  |                |              |
| 2–aminoadipic acid                | 0.39                  | <b>0.008**</b>   | 0.66           | 0.17         |
| 2–hydroxybutyric acid             | <b>0.01*</b>          | 0.38             | 0.38           | 0.56         |
| 2–oxovaleric acid                 | <b>0.01*</b>          | 0.29             | 0.29           | 0.82         |
| 3–hydroxybutyric acid             | 0.14                  | 0.05             | 0.58           | 0.56         |
| Ketoisovaleric acid               | 0.12                  | <b>0.001**</b>   | 0.55           | <b>0.04*</b> |
| Hypotaurine                       | 0.74                  | <b>0.007**</b>   | 0.89           | 0.14         |
| Inosine                           | <b>0.0008***</b>      | 0.48             | 0.09           | 0.86         |
| Ornithine                         | 0.17                  | <b>0.01**</b>    | 0.59           | 0.19         |
| Proline                           | 0.41                  | 0.06             | 0.58           | 0.56         |
| Uric acid                         | 0.25                  | <b>0.002**</b>   | 0.59           | <b>0.04*</b> |
| Xanthine                          | 0.54                  | <b>0.005**</b>   | 0.77           | 0.14         |

FDR = False Discovery Rate, BH = Benjamini–Hochberg, HIIT = High–Intensity Interval Training; MICT = Moderate–Intensity Continuous Training; TCA = Tricarboxylic acid, / = ratio, \*: < 0.05, \*\*: < 0.01, \*\*\*: < 0.001

**Table S5–b:** False Discovery Rate Analysis (FDR) for each type of intervention alone on the 50 significant metabolites obtained following a 12–week High–Intensity Interval Training (HIIT) or Moderate–Intensity Continuous Training (MICT) in obese older adults.

| Metabolites                  | ANOVA            |                  | FDR (BH)    |             |
|------------------------------|------------------|------------------|-------------|-------------|
|                              | HIIT effect      | MICT effect      | HIIT effect | MICT effect |
| <i><b>Fat metabolism</b></i> |                  |                  |             |             |
| Acetylcarnitine              | <b>0.03*</b>     | 0.28             | 0.44        | 0.82        |
| Arachidonic acid             | 0.08             | 0.12             | 0.53        | 0.65        |
| Butanoic acid                | 0.09             | 0.15             | 0.53        | 0.65        |
| Carnitine C18:0              | <b>0.04*</b>     | 0.37             | 0.44        | 0.82        |
| Ceramide (18:1/22:0)         | 0.10             | 0.06             | 0.65        | 0.56        |
| Ceramide (18:1/24:0)         | 0.05             | 0.16             | 0.44        | 0.65        |
| DG (18:1/18:3)               | <b>0.04*</b>     | <b>0.001**</b>   | 0.44        | <b>0.04</b> |
| DG (20:4/18:2)               | 0.05             | 0.39             | 0.44        | 0.83        |
| Isobutyric acid              | 0.70             | <b>0.002**</b>   | 0.17        | 0.90        |
| Linoleic acid                | 0.03             | 0.33             | 0.38        | 0.36        |
| Margaric acid                | <b>0.03*</b>     | 0.006            | 0.44        | 0.14        |
| Pantothenic acid             | 0.71             | <b>0.0007***</b> | 0.88        | <b>0.04</b> |
| PCae (15:0)                  | <b>0.01*</b>     | 0.15             | 0.29        | 0.65        |
| PCae (16:0)                  | <b>0.02*</b>     | 0.22             | 0.29        | 0.74        |
| PCae (20:2)                  | 0.13             | 0.10             | 0.45        | 0.62        |
| PCae (22:1)                  | <b>0.04*</b>     | 0.22             | 0.88        | 0.90        |
| PCae (22:4)                  | 0.25             | 0.06             | 0.45        | 0.56        |
| PEaa (36:1)                  | 0.12             | 0.12             | 0.55        | 0.65        |
| PEaa (38:6)                  | 0.10             | 0.07             | 0.55        | 0.58        |
| PEee (19:1)                  | 0.48             | <b>0.003**</b>   | 0.73        | 0.10        |
| TG (12:0/12:0/16:1)          | 0.18             | 0.08             | 0.59        | 0.59        |
| TG (12:0/14:0/16:0)          | 0.17             | 0.03             | 0.59        | 0.49        |
| TG(14:0/16:0/16:0)           | 0.12             | 0.14             | 0.55        | 0.65        |
| TG (14:0/16:2/16:2)          | 0.09             | 0.15             | 0.59        | 0.65        |
| TG (16:1/18:1/18:0)          | 0.33             | <b>0.003**</b>   | 0.65        | 0.10        |
| TG (16:1/18:3/18:2)          | 0.83             | 0.0009           | 0.44        | <b>0.04</b> |
| TG (16:1/18:3/20:4)          | 0.16             | 0.05             | 0.94        | 0.55        |
| TG (16:2/18:2/18:2)          | 0.98             | <b>0.0003***</b> | 0.98        | <b>0.04</b> |
| Undecanoic acid              | <b>0.0008***</b> | 0.06             | 0.09        | 0.56        |

FDR = False Discovery Rate, BH = Benjamini–Hochberg, HIIT = High–Intensity Interval Training; MICT = Moderate–Intensity Continuous Training; DG = Diglyceride; PCae = acyl–alkyl–phosphatidylcholine; PEaa = alkyl acyl–phosphatidylethanolamine; PEee = ether–phosphatidylethanolamine; TG = Triglyceride \*: < 0.05, \*\*: < 0.01, \*\*\*: < 0.001



## **List of inclusion and exclusion criteria of the participants**

To be included in this study, participants had to meet the following criteria: 1) age 60 and over; 2) obese (BMI between 30 and 40 kg.m<sup>-2</sup> or fat mass (%; DXA) equal or superior to 27% in men and 40% in women) or a waist circumference greater than 102 cm for men and 88 cm for women; 3) inactive (less than two hours of structured physical activity per week); 4) no involvement in a vigorous exercise program for at least 12 months; 5) able to follow the exercise training; 6) stable weight ( $\pm$  5 kg) for 6 months; 7) non-smokers and moderate drinkers (max: 15 g/day of alcohol); 8) able to understand French or English; and 9) postmenopausal for women (*i.e.*, 12 consecutive months without menses). Exclusion criteria were the following: 1) presence of metal implant (pacemaker); 2) asthma requiring oral steroid treatment; 3) use of medication that could affect metabolism or cardiovascular function; 4) use of anticoagulants (only for participants undergoing biopsies). Participants with diagnosed but untreated neurological, cardiovascular or lung diseases, or cognitive disorders were also excluded.
